# Supplementary material
Source: Elsevier journal article supplement (https://www.sciencedirect.com/science/article/pii/S0300893218300423)
Supplement: mmc1 [file mmc1.pdf]

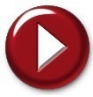

**Supplementary material**

---

**Predictors of Need for Permanent Pacemaker Implantation and Conduction Abnormalities  
With a Novel Self-expanding Transcatheter Heart Valve**

---

**Table 1 of the supplementary material**

Indication for Patients Requiring PPI

| Indication          | Total PPI<br>(n = 28) |
|---------------------|-----------------------|
| Persistent AVB III  | 12 (42.9)             |
| Transient AVB III   | 1 (3.6)               |
| Intermittent AVB II | 6 (21.4)              |
| LBBB and AVB I      | 1 (3.6)               |
| Sick sinus syndrome | 1 (3.6)               |
| Bradycardia         | 7 (25.0)              |

AVB, atrioventricular block; PPI, permanent pacemaker implantation.

**Table 2 of the supplementary material**

Multivariate Analysis for New-onset Left Bundle Branch Block

| Variable                    | aOR (95%CI)         | <i>P</i> |
|-----------------------------|---------------------|----------|
| Device to annulus ratio %   | 0.972 (0.928-1.018) | .226     |
| Mean implantation depth, mm | 1.159 (0.909-1.478) | .235     |
| Atrioventricular block I    | 0.844 (0.282-2.527) | .761     |
| EuroSCORE %                 | 1.038 (1.002-1.076) | .038     |

95%CI, 95% confidence interval; aOR, adjusted odds ratio.

**Figure of the supplementary material.** Technical features and sizing recommendations of the ACURATE neo.

**Supplemental Figure 1 – Technical features and sizing recommendations of the ACURATE neo**

|                               | S         | M         | L         |
|-------------------------------|-----------|-----------|-----------|
|                               |           |           |           |
| <b>Prosthesis parameters</b>  |           |           |           |
| Outer area (cm <sup>2</sup> ) | 5.309     | 6.158     | 7.069     |
| Waist diameter                | 23        | 25        | 27        |
| Upper Crown diameter          | 28        | 30        | 32        |
| <b>Sizing recommendations</b> |           |           |           |
| Area (cm <sup>2</sup> )       | 3.46-4.15 | 4.15-4.91 | 4.91-5.73 |
| Perimeter (mm)                | 66-72     | 72-79     | 79-85     |
| Diameter (mm)                 | 21-23     | 23-25     | 25-27     |
